# Supplementary material for: HERV-K and HERV-H Env Proteins Induce a Humoral Response in Prostate Cancer Patients
Source: MDPI journal article supplement (doi:10.3390/pathogens11010095), 2022-01-14

**Supplementary Figure S1.** Competitive ELISA assay. The figure shows the results of the reaction against the specific peptide HERV-K env<sub>109-126</sub> of a plasma of a positive patient sample that has been pre-incubated with: no peptide, a different positive peptide (Annexin A2 <sub>13-37</sub> LEGDHSTPPSAYGSVKAYTNFDAER) and the peptide of interest (HERV-K env<sub>109-126</sub>). \*(The experiment was performed in triplicate)

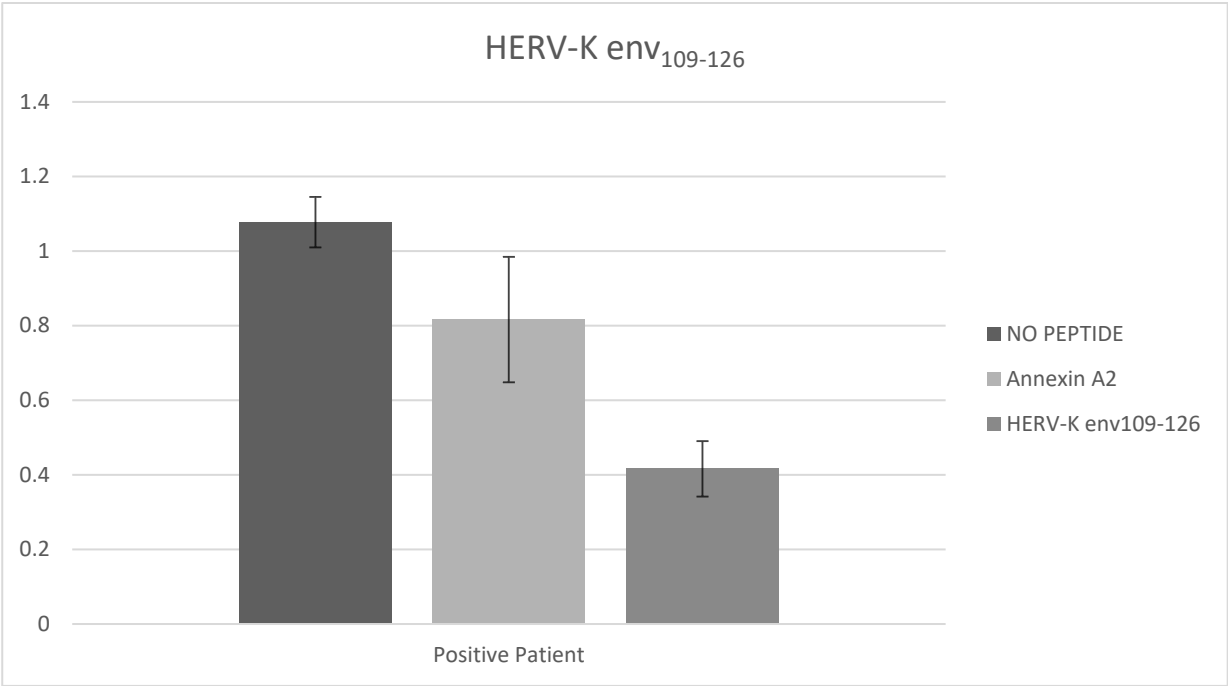

Supplement: s1 [file s1]
